# Supplementary material
Source: PubMed Central journal article supplement (PMC7613064)

# Supplementary Figure 1

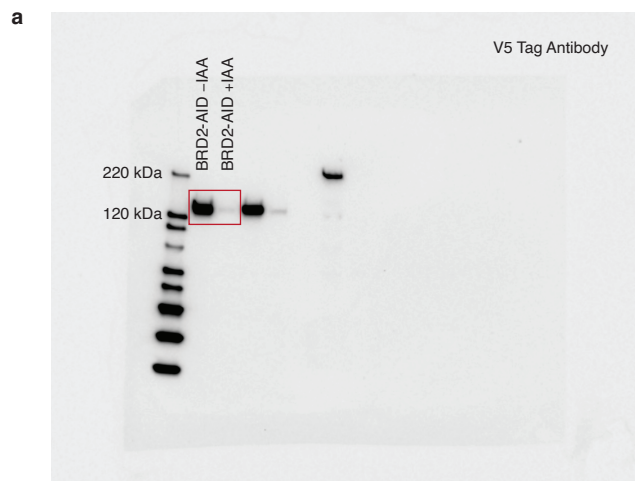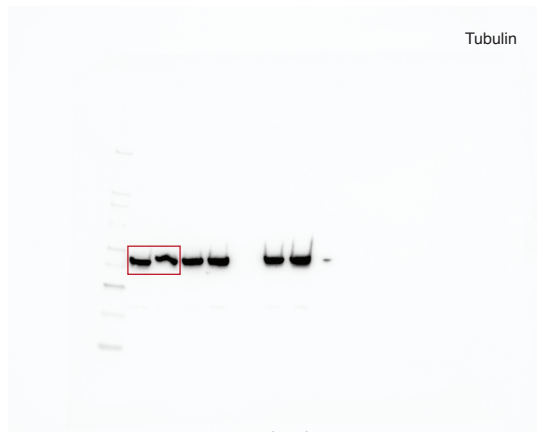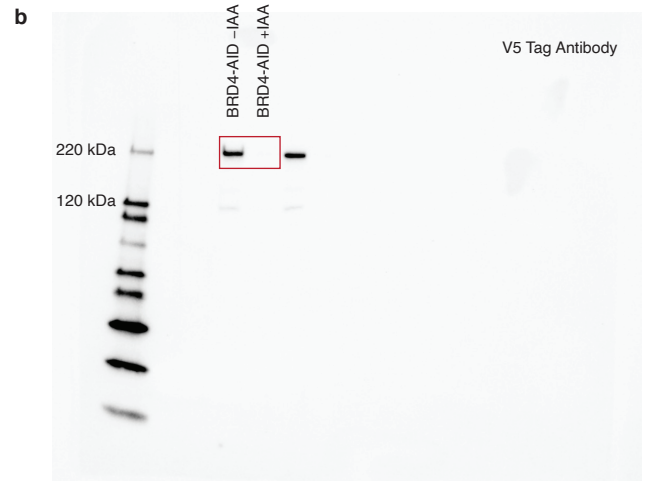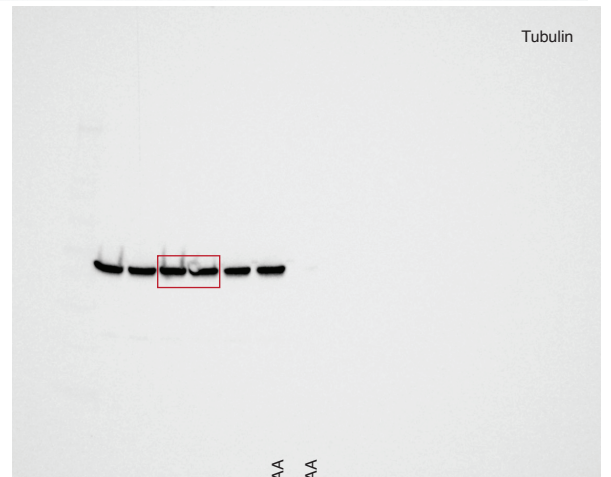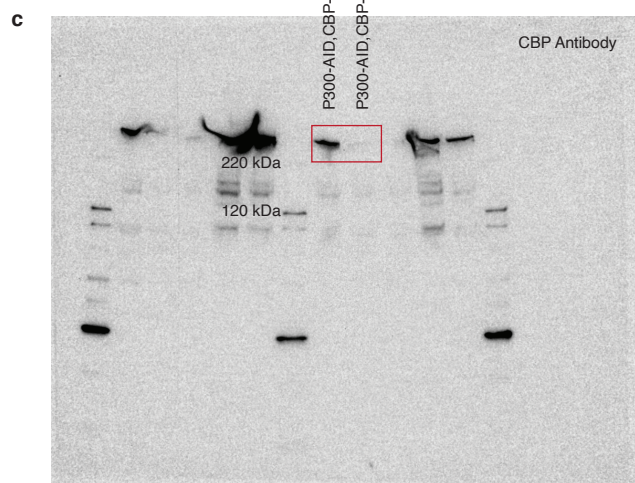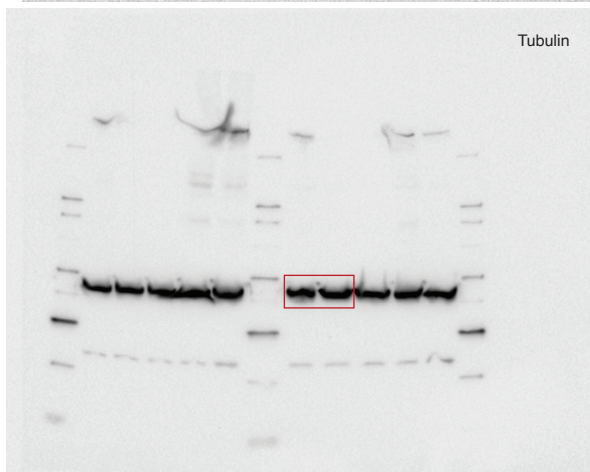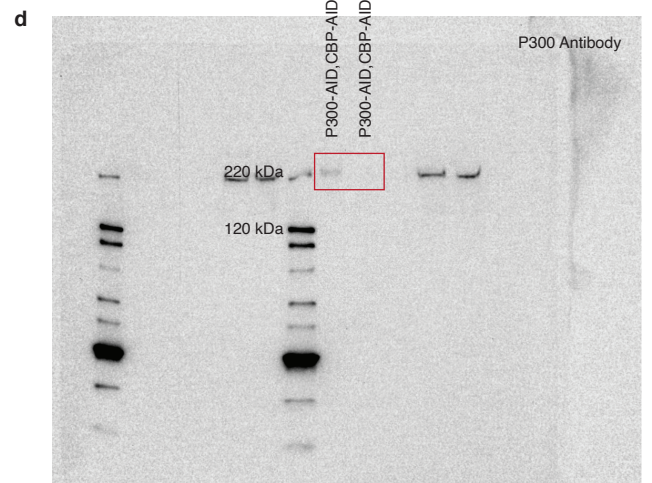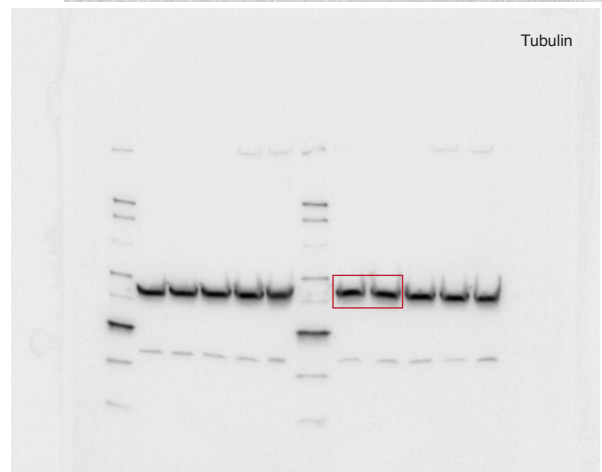

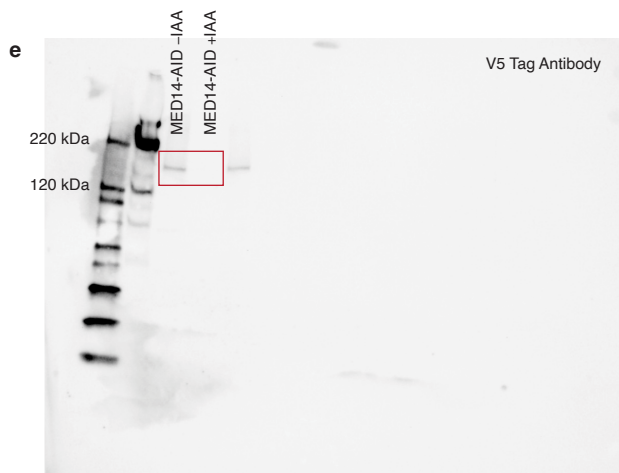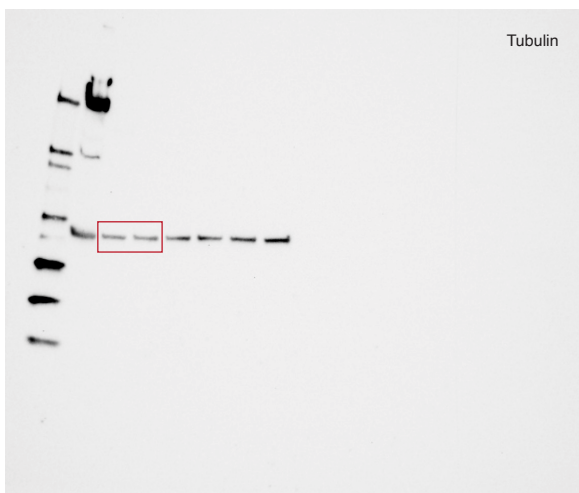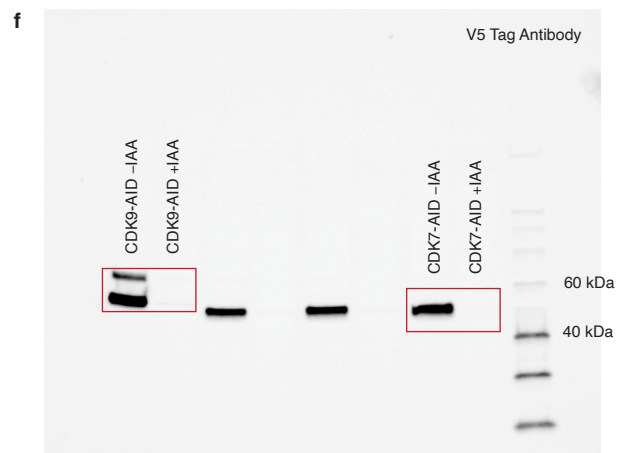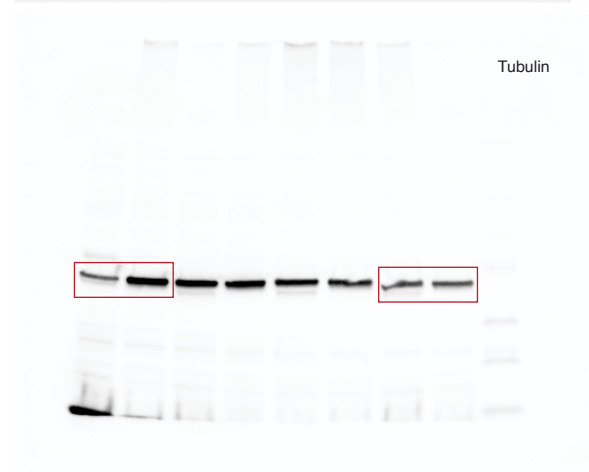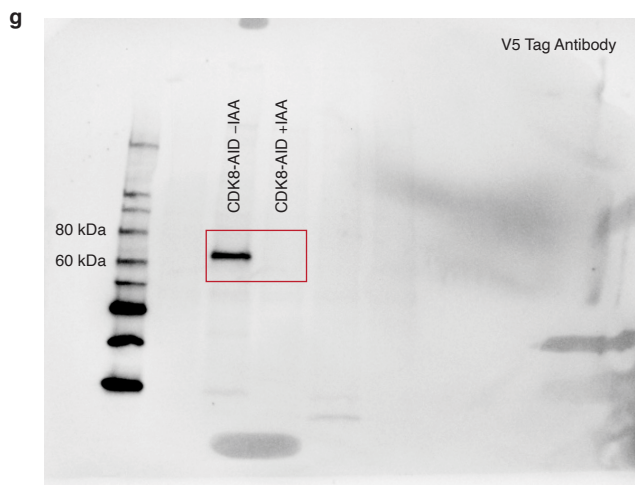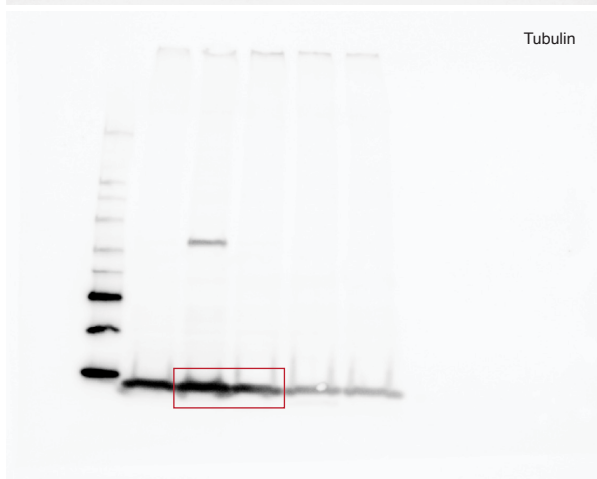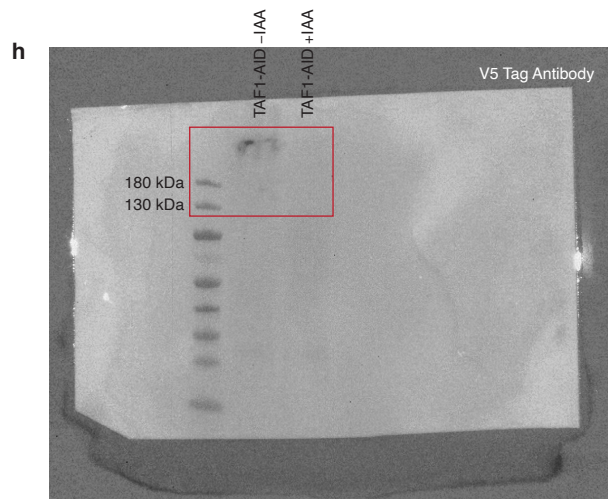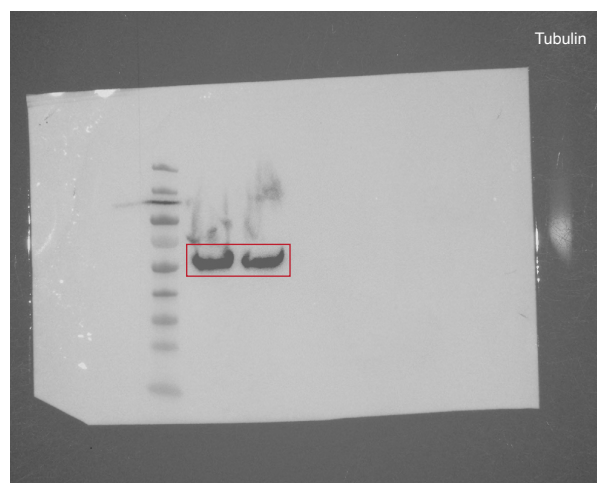

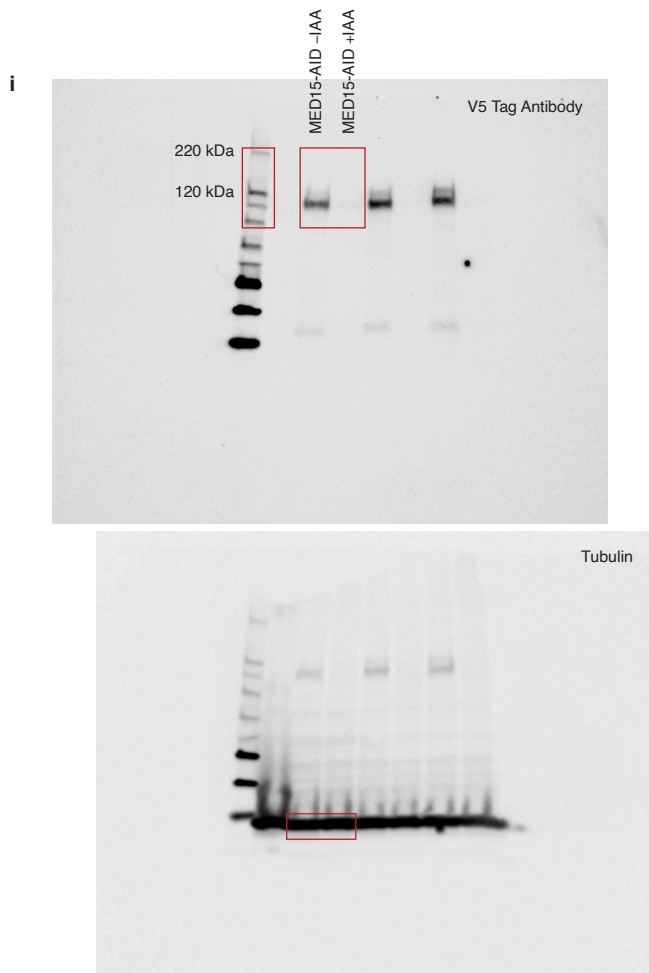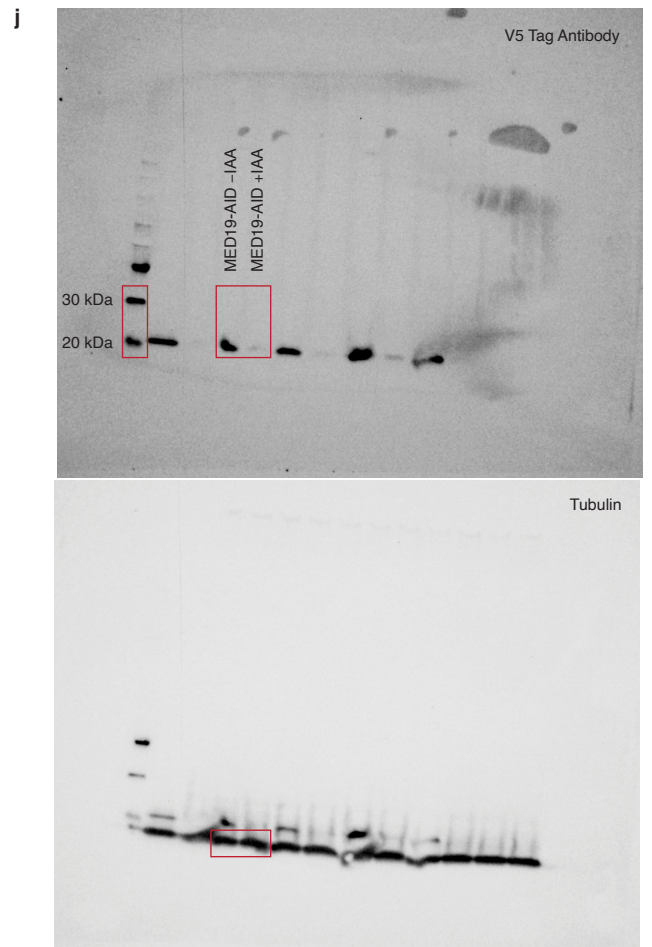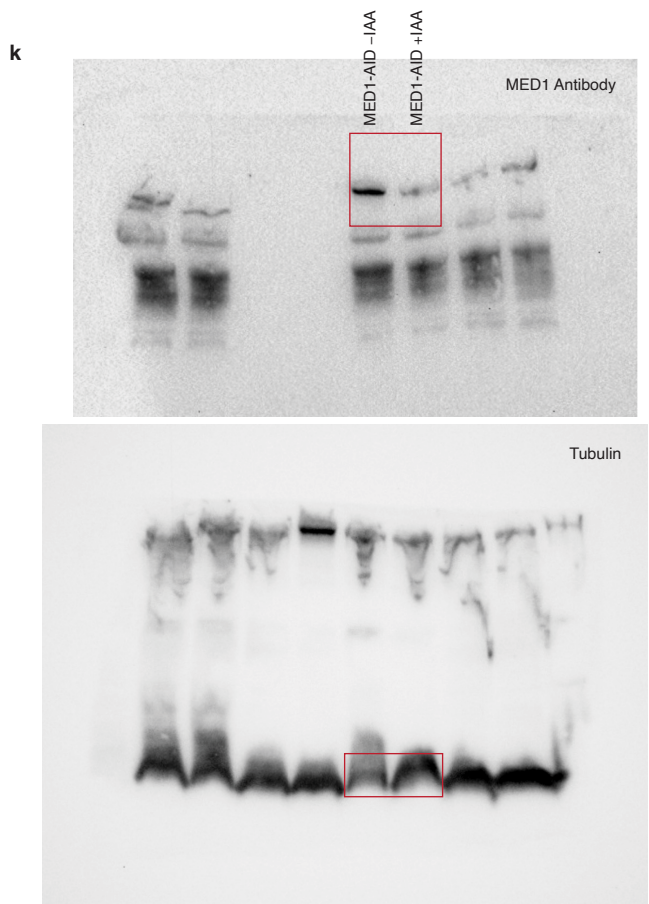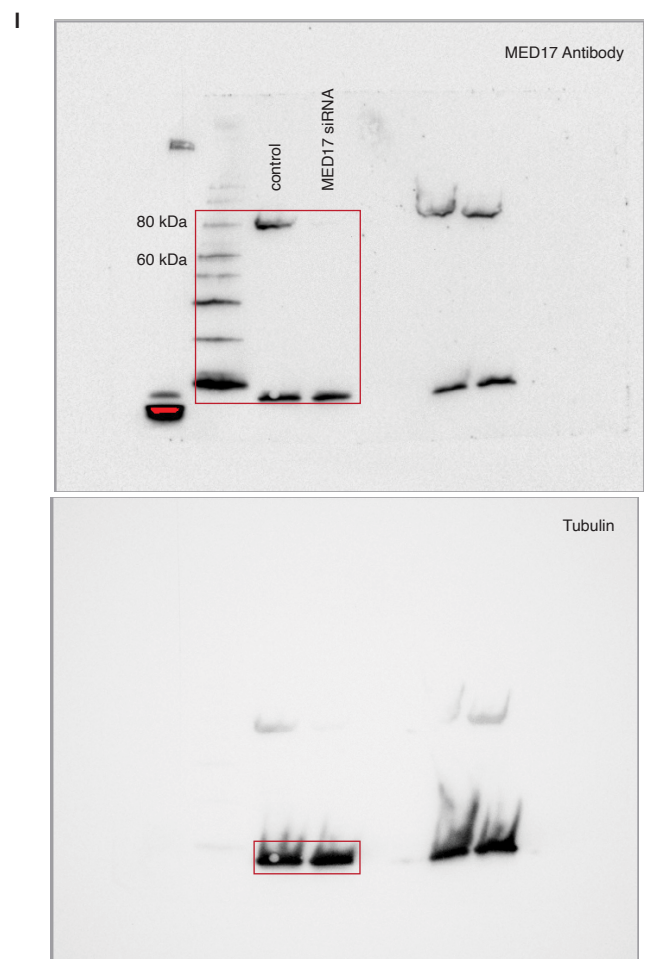

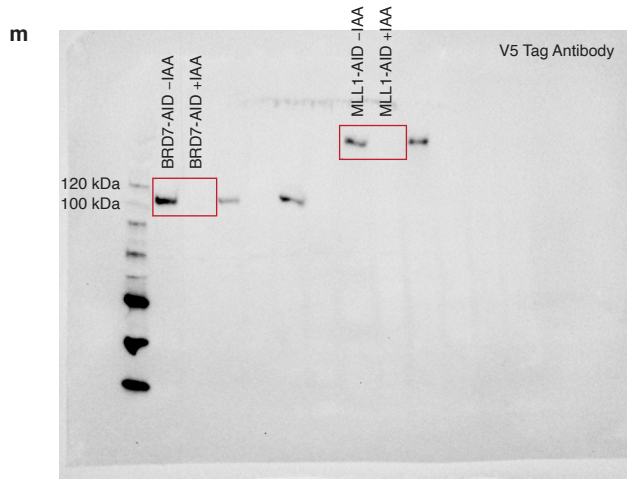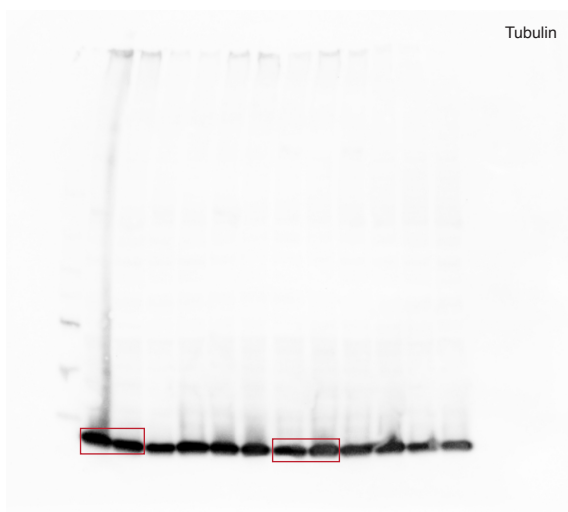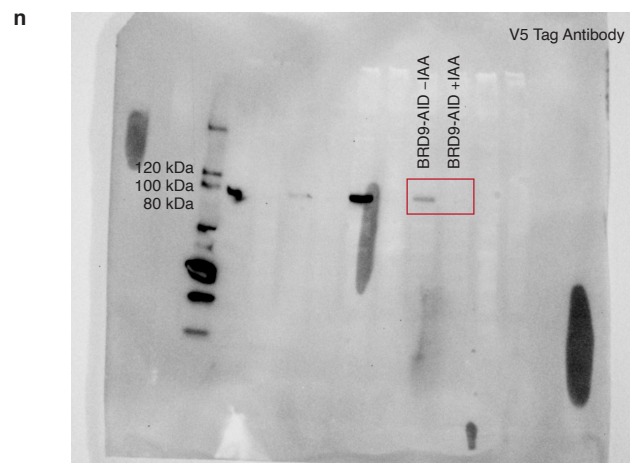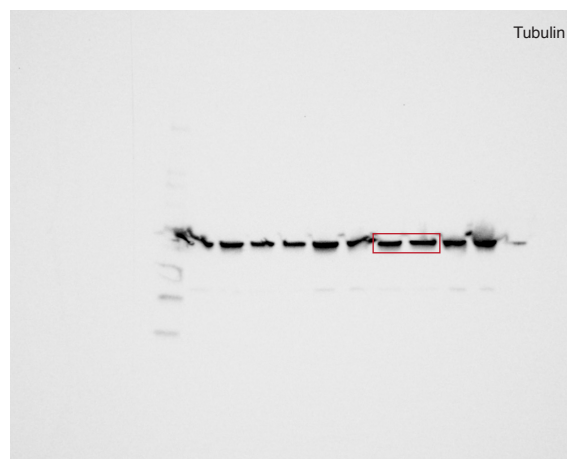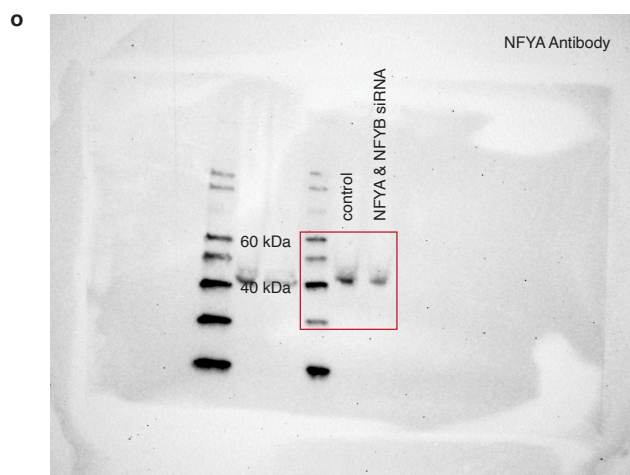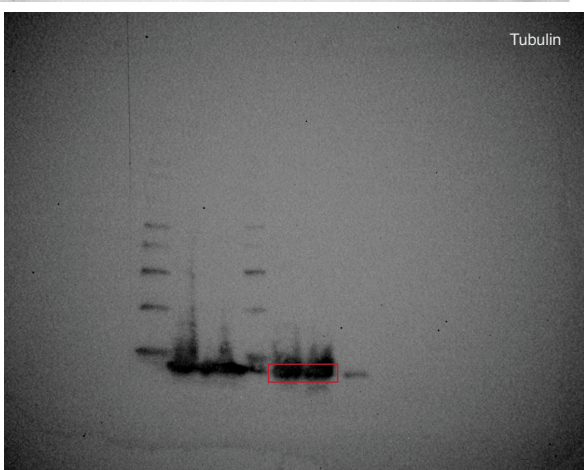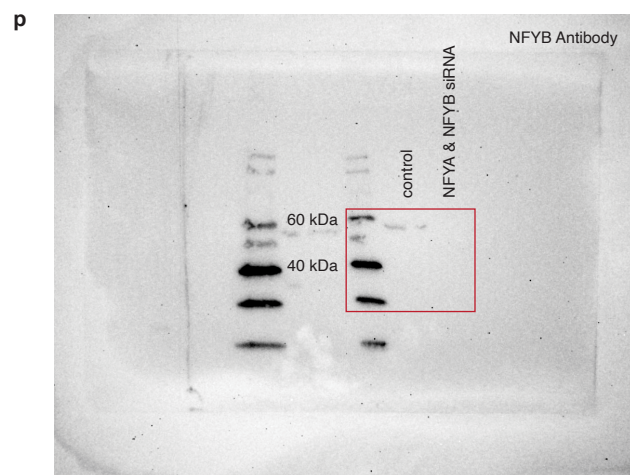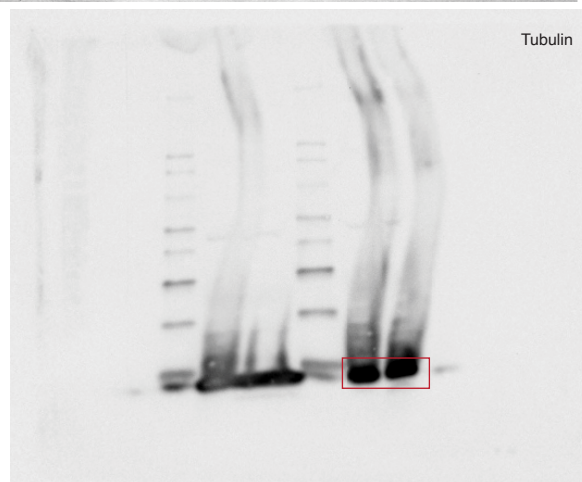

Supplement: EMS146216-supplement-Supplementary_Figure_1.pdf [file EMS146216-supplement-Supplementary_Figure_1.pdf]
